# Supplementary material
Source: MDPI journal article supplement (https://www.mdpi.com/2071-1050/14/5/3125)
Supplement: s1 [file s1]

# **Carbon Footprint of a Typical Neapolitan Pizzeria**

Aniello Falciano <sup>1</sup>, Alessio Cimini <sup>2</sup>, Paolo Masi <sup>1</sup> and Mauro Moresi <sup>2,\*</sup>

<sup>1</sup> Department of Agriculture, University of Naples Federico II,  
80055 Portici, Italy

<sup>2</sup> Department of for Innovation in the Biological, Agrofood and  
Forestry Systems, University of Tuscia, 01100 Viterbo, Italy

## Supplementary Materials

**Table S1.** Emission factors for the energy sources, means of transport, production of raw and packaging materials, and disposal of processing and post-consumer wastes used to assess the cradle-to-grave carbon footprint of a Neapolitan pizzeria, as extracted from Ecoinvent v. 3.7 database of the LCA software Simapro (Prè Consultants, Amersfoort, NL) and other papers.

| Emission Factor                                                          | Value     | Unit                                                 | Ref.                                  |
|--------------------------------------------------------------------------|-----------|------------------------------------------------------|---------------------------------------|
| <i>Energy source</i>                                                     |           |                                                      |                                       |
| Electricity, low voltage (<1kV), grid/IT                                 | 0.452     | kg CO <sub>2e</sub> kWh <sup>-1</sup>                | Ecoinvent v. 3.7                      |
| Electricity production, wind, >3MW turbine onshore{IT}  Cut-off, S       | 0.0293    | kg CO <sub>2e</sub> kWh <sup>-1</sup>                | Ecoinvent v. 3.7                      |
| Electricity production, hydro, reservoir, alpine region{IT}  Cut-off, S  | 0.00594   | kg CO <sub>2e</sub> kWh <sup>-1</sup>                | Ecoinvent v. 3.7                      |
| Woodfire                                                                 | 0.0406    | kg CO <sub>2e</sub> kg <sup>-1</sup>                 | Ecoinvent v. 3.7+ SimaPro 9.2         |
| <i>Means of transport</i>                                                |           |                                                      |                                       |
| Transport, lorry 3.5-7.5Mg, Euro5                                        | 0.506     | kg CO <sub>2e</sub> Mg <sup>-1</sup> km <sub>1</sub> | Ecoinvent v. 3.7                      |
| Transport, lorry 7.5-16 Mg, Euro5                                        | 0.212     | kg CO <sub>2e</sub> Mg <sup>-1</sup> km <sub>1</sub> | Ecoinvent v. 3.7                      |
| Transport, freight, light commercial vehicle {EU without CH}  Cut-off, S | 1.83      | kg CO <sub>2e</sub> Mg <sup>-1</sup> km <sub>1</sub> | Ecoinvent v. 3.7                      |
| Municipal waste collection service by 21-Mg ton lorry {RoW}  Cut-off, S  | 1.27      | kg CO <sub>2e</sub> Mg <sup>-1</sup> km <sub>1</sub> | Ecoinvent v. 3.7                      |
| <i>Raw Materials</i>                                                     |           |                                                      |                                       |
| Tap Water {EU without CH}  Cut-off, U                                    | 0.278     | kg CO <sub>2e</sub> m <sup>-3</sup>                  | Ecoinvent v. 3.7                      |
| Soft wheat flour                                                         | 0.61±0.23 | kg CO <sub>2e</sub> kg <sup>-1</sup>                 | SUEATABLE_LIFE database <sup>35</sup> |
| Compressed yeast                                                         | 0.82      | kg CO <sub>2e</sub> kg <sup>-1</sup>                 | SUEATABLE_LIFE database <sup>35</sup> |
| Peeled tomatoes                                                          | 1.28±0.4  | kg CO <sub>2e</sub> kg <sup>-1</sup>                 | SUEATABLE_LIFE database <sup>35</sup> |
| Fresh tomatoes                                                           | 0.48±0.30 | kg CO <sub>2e</sub> kg <sup>-1</sup>                 | SUEATABLE_LIFE database <sup>35</sup> |
| Water Buffalo Mozzarella cheese                                          | 32.7±0.1  | kg CO <sub>2e</sub> kg <sup>-1</sup>                 | Berlese et al. (2019) <sup>53</sup>   |
| Mozzarella cheese                                                        | 8.5±1.4   | kg CO <sub>2e</sub> kg <sup>-1</sup>                 | SUEATABLE_LIFE database <sup>35</sup> |
| Grana Padano cheese                                                      | 14.3±2.8  | kg CO <sub>2e</sub> kg <sup>-1</sup>                 | SUEATABLE_LIFE database <sup>35</sup> |
| Ricotta cheese                                                           | 3.4       | kg CO <sub>2e</sub> kg <sup>-1</sup>                 | SUEATABLE_LIFE database <sup>35</sup> |

|                                       |           |                                      |                                                                                              |
|---------------------------------------|-----------|--------------------------------------|----------------------------------------------------------------------------------------------|
| Provola cheese                        | 10.82     | kg CO <sub>2e</sub> kg <sup>-1</sup> | SUEATABLE_LIFE database <sup>35</sup>                                                        |
| Pecorino Romano cheese                | 18.9±2.4  | kg CO <sub>2e</sub> kg <sup>-1</sup> | SUEATABLE_LIFE database <sup>35</sup>                                                        |
| Naples salami                         | 11.3      | kg CO <sub>2e</sub> kg <sup>-1</sup> | <sup>38</sup>                                                                                |
| Baked ham                             | 10.7      | kg CO <sub>2e</sub> kg <sup>-1</sup> | <sup>38</sup>                                                                                |
| Deboned pressed dry-cured ham         | 12.7±4.0  | kg CO <sub>2e</sub> kg <sup>-1</sup> | <sup>38</sup>                                                                                |
| Cracklings                            | 0.82      | kg CO <sub>2e</sub> kg <sup>-1</sup> | Animal meal, from dry rendering, at plant/NL<br>Economic: Agri-footprint Economic Allocation |
| Baby artichokes                       | 0.41±0.11 | kg CO <sub>2e</sub> kg <sup>-1</sup> | <sup>36, 35</sup>                                                                            |
| Mushrooms                             | 1.8±1.1   | kg CO <sub>2e</sub> kg <sup>-1</sup> | SUEATABLE_LIFE database <sup>35</sup>                                                        |
| Rucola leaves                         | 0.40±0.15 | kg CO <sub>2e</sub> kg <sup>-1</sup> | SUEATABLE_LIFE database <sup>35</sup>                                                        |
| Escarole                              | 0.40±0.15 | kg CO <sub>2e</sub> kg <sup>-1</sup> | SUEATABLE_LIFE database <sup>35</sup>                                                        |
| Eggplant                              | 1.35±0.07 | kg CO <sub>2e</sub> kg <sup>-1</sup> | <sup>35, 36</sup>                                                                            |
| Peppers                               | 1.18±0.08 | kg CO <sub>2e</sub> kg <sup>-1</sup> | SUEATABLE_LIFE database <sup>35</sup>                                                        |
| Broccoli                              | 0.67±0.36 | kg CO <sub>2e</sub> kg <sup>-1</sup> | SUEATABLE_LIFE database <sup>35</sup>                                                        |
| Table salt                            | 0.159     | kg CO <sub>2e</sub> kg <sup>-1</sup> | Ecoinvent v. 3.7                                                                             |
| Extra-virgin olive oil                | 3.8±2.8   | kg CO <sub>2e</sub> kg <sup>-1</sup> | SUEATABLE_LIFE database <sup>35</sup>                                                        |
| Oregano                               | 1.6       | kg CO <sub>2e</sub> kg <sup>-1</sup> | <sup>39</sup>                                                                                |
| Garlic                                | 0.67±0.07 | kg CO <sub>2e</sub> kg <sup>-1</sup> | SUEATABLE_LIFE database <sup>35</sup>                                                        |
| Extra-virgin olive oil                | 3.8±2.8   | kg CO <sub>2e</sub> kg <sup>-1</sup> | SUEATABLE_LIFE database <sup>35</sup>                                                        |
| Basil leaves                          | 1.6       | kg CO <sub>2e</sub> kg <sup>-1</sup> | <sup>40</sup>                                                                                |
| <b><i>Beverages</i></b>               |           |                                      |                                                                                              |
| Mineral water in 75-cL glass bottles  | 0.63±0.02 | kg CO <sub>2e</sub> L <sup>-1</sup>  | <sup>41-42</sup>                                                                             |
| Beer in 75-cL glass bottles           | 0.69±0.52 | kg CO <sub>2e</sub> L <sup>-1</sup>  | <sup>35, 55</sup>                                                                            |
| Beer in 33-cL glass bottles           | 0.79±0.52 | kg CO <sub>2e</sub> L <sup>-1</sup>  | <sup>35, 55</sup>                                                                            |
| Coca-Cola in 33-cL glass bottles      | 1.09      | kg CO <sub>2e</sub> L <sup>-1</sup>  | <sup>43</sup>                                                                                |
| Coca-Cola Zero in 33-cL aluminum cans | 0.45      | kg CO <sub>2e</sub> L <sup>-1</sup>  | <sup>43</sup>                                                                                |
| Fanta in 33-cL aluminum cans          | 0.52      | kg CO <sub>2e</sub> L <sup>-1</sup>  | <sup>43</sup>                                                                                |
| <b><i>Packaging Materials</i></b>     |           |                                      |                                                                                              |
| EPA wooden pallet                     | 0.244     | kg CO <sub>2e</sub> kg <sup>-1</sup> | Ecoinvent v. 3.7+ SimaPro 9.2                                                                |
| 25-kg paper bags                      | 1.51      | kg CO <sub>2e</sub> kg <sup>-1</sup> | Ecoinvent v. 3.7+ SimaPro 9.2                                                                |
| 25-g multilayer foil                  | 3.21      | kg CO <sub>2e</sub> kg <sup>-1</sup> | Ecoinvent v. 3.7+ SimaPro 9.2                                                                |
| 400-g metal can                       | 2.47      | kg CO <sub>2e</sub> kg <sup>-1</sup> | Ecoinvent v. 3.7+ SimaPro 9.2                                                                |

|                                                                            |       |                                      |                                               |
|----------------------------------------------------------------------------|-------|--------------------------------------|-----------------------------------------------|
| 5.0-kg wooden box                                                          | 1.5   | kg CO <sub>2e</sub> kg <sup>-1</sup> | Ecoinvent v. 3.7+ SimaPro 9.2                 |
| 3.0-kg polystyrene box                                                     | 4.13  | kg CO <sub>2e</sub> kg <sup>-1</sup> | Ecoinvent v. 3.7+ SimaPro 9.2                 |
| PE bag of different capacities                                             | 2.53  | kg CO <sub>2e</sub> kg <sup>-1</sup> | Ecoinvent v. 3.7+ SimaPro 9.2                 |
| 1.5-kg paper layer                                                         | 0.557 | kg CO <sub>2e</sub> kg <sup>-1</sup> | Ecoinvent v. 3.7+ SimaPro 9.2                 |
| 0.6-kg twine net                                                           | 12.4  | kg CO <sub>2e</sub> kg <sup>-1</sup> | Ecoinvent v. 3.7+ SimaPro 9.2                 |
| 1-kg glass jar                                                             | 1.07  | kg CO <sub>2e</sub> kg <sup>-1</sup> | Ecoinvent v. 3.7+ SimaPro 9.2                 |
| 1 metal lid                                                                | 2.82  | kg CO <sub>2e</sub> kg <sup>-1</sup> | Ecoinvent v. 3.7+ SimaPro 9.2                 |
| 100-g bunches using plasticized wire                                       | 2.2   | kg CO <sub>2e</sub> kg <sup>-1</sup> | Ecoinvent v. 3.7+ SimaPro 9.2                 |
| 0.6-kg wooden cassette                                                     | 1.5   | kg CO <sub>2e</sub> kg <sup>-1</sup> | Ecoinvent v. 3.7+ SimaPro 9.2                 |
| 15-kg PP box                                                               | 3.14  | kg CO <sub>2e</sub> kg <sup>-1</sup> | Ecoinvent v. 3.7+ SimaPro 9.2                 |
| 1-kg light cardboard box                                                   | 1.40  | kg CO <sub>2e</sub> kg <sup>-1</sup> | Ecoinvent v. 3.7+ SimaPro 9.2                 |
| 5-L metal can                                                              | 4.28  | kg CO <sub>2e</sub> kg <sup>-1</sup> | Ecoinvent v. 3.7+ SimaPro 9.2                 |
| 1-kg PET jar                                                               | 3.80  | kg CO <sub>2e</sub> kg <sup>-1</sup> | Ecoinvent v. 3.7+ SimaPro 9.2                 |
| 100-g PE net                                                               | 2.84  | kg CO <sub>2e</sub> kg <sup>-1</sup> | Ecoinvent v. 3.7+ SimaPro 9.2                 |
| 300-g PE tray                                                              | 2.84  | kg CO <sub>2e</sub> kg <sup>-1</sup> | Ecoinvent v. 3.7+ SimaPro 9.2                 |
| Al-PET coated cardboard pizza box                                          | 1.41  | kg CO <sub>2e</sub> kg <sup>-1</sup> | Ecoinvent v. 3.7+ SimaPro 9.2                 |
| PET tanks or bottles of different volumes                                  | 1.94  | kg CO <sub>2e</sub> kg <sup>-1</sup> | Ecoinvent v. 3.7+ SimaPro 9.2                 |
| <b>Detergents</b>                                                          |       |                                      |                                               |
| Dishwashing liquid detergent                                               | 0.62  | kg CO <sub>2e</sub> kg <sup>-1</sup> | <sup>26</sup> ; Ecoinvent v. 3.7+ SimaPro 9.2 |
| Floor washing liquid detergent                                             | 0.66  | kg CO <sub>2e</sub> kg <sup>-1</sup> | <sup>26</sup> ; Ecoinvent v. 3.7+ SimaPro 9.2 |
| Glass window cleaner detergent                                             | 0.64  | kg CO <sub>2e</sub> kg <sup>-1</sup> | <sup>26</sup> ; Ecoinvent v. 3.7+ SimaPro 9.2 |
| Toilet detergent                                                           | 2.56  | kg CO <sub>2e</sub> kg <sup>-1</sup> | <sup>26</sup> ; Ecoinvent v. 3.7+ SimaPro 9.2 |
| <b>Table set</b>                                                           |       |                                      |                                               |
| Ceramic plates                                                             | 1.83  | kg CO <sub>2e</sub> kg <sup>-1</sup> | Ecoinvent v. 3.7+ SimaPro 9.2                 |
| Stainless steel cutlery                                                    | 7.91  | kg CO <sub>2e</sub> kg <sup>-1</sup> | Ecoinvent v. 3.7+ SimaPro 9.2                 |
| Glasses                                                                    | 1.07  | kg CO <sub>2e</sub> kg <sup>-1</sup> | Ecoinvent v. 3.7+ SimaPro 9.2                 |
| Paper tablecloths                                                          | 1.59  | kg CO <sub>2e</sub> kg <sup>-1</sup> | Ecoinvent v. 3.7+ SimaPro 9.2                 |
| Paper napkins                                                              | 1.59  | kg CO <sub>2e</sub> kg <sup>-1</sup> | Ecoinvent v. 3.7+ SimaPro 9.2                 |
| <b>Wastewater treatment and waste disposal</b>                             |       |                                      |                                               |
| Wastewater treatment, av. {EU without CH}   capacity 1E9 l/yr   Cut-off, S | 0.476 | kg CO <sub>2e</sub> m <sup>-3</sup>  | Ecoinvent v. 3.7                              |
| <b>Landfill</b>                                                            |       |                                      |                                               |
| Waste Paperboard {RoW} treatment of sanitary landfill   Cut-off, S         | 1.52  | kg CO <sub>2e</sub> kg <sup>-1</sup> | Ecoinvent v. 3.7                              |

|                                                                                                                                             |         |                                      |                  |
|---------------------------------------------------------------------------------------------------------------------------------------------|---------|--------------------------------------|------------------|
| Waste plastic, mixture {RoW}   treatment of sanitary landfill   Cut-off, S                                                                  | 0.102   | kg CO <sub>2e</sub> kg <sup>-1</sup> | Ecoinvent v. 3.7 |
| Waste aluminum {RoW}, treatment of sanitary landfill   Cut-off, S                                                                           | 0.0383  | kg CO <sub>2e</sub> kg <sup>-1</sup> | Ecoinvent v. 3.7 |
| Waste wood, untreated {RoW}   treatment of sanitary landfill   Cut-off, S                                                                   | 0.0747  | kg CO <sub>2e</sub> kg <sup>-1</sup> | Ecoinvent v. 3.7 |
| Sludge from pulp&paper production{RoW}   treatment of, sanitary landfill   Cut-off, S assumed as equivalent to landfilling of organic waste | 1.14    | kg CO <sub>2e</sub> kg <sup>-1</sup> | Ecoinvent v. 3.7 |
| Glass waste {CH}   treatment of inert material landfill Cut-off, S                                                                          | 0.00418 | kg CO <sub>2e</sub> kg <sup>-1</sup> | Ecoinvent v. 3.7 |
| Scrap steel {EU without CH}   inert material landfill   Cut-off, S                                                                          | 0.00516 | kg CO <sub>2e</sub> kg <sup>-1</sup> | Ecoinvent v. 3.7 |
| Wood ash mixture, pure {RoW}   treatment of, sanitary landfill   Cut-off, S                                                                 | 0.0184  | kg CO <sub>2e</sub> kg <sup>-1</sup> | Ecoinvent v. 3.7 |
| Municipal solid waste {RoW}   treatment of, sanitary landfill   Cut-off, S                                                                  | 0.626   | kg CO <sub>2e</sub> kg <sup>-1</sup> | Ecoinvent v. 3.7 |
| <b>Recycling</b>                                                                                                                            |         |                                      |                  |
| Paper (waste treatment) {GLO}   recycling of paper   Cut-off, S                                                                             | 0       | kg CO <sub>2e</sub> kg <sup>-1</sup> | Ecoinvent v. 3.7 |
| Paper (waste treatment) {GLO}   recycling of paper   APOS, S                                                                                | -0.139  | kg CO <sub>2e</sub> kg <sup>-1</sup> | Ecoinvent v. 3.7 |
| Mixed plastics (waste treatment) {GLO}   recycling of mixed plastics   Cut-off, S                                                           | 0       | kg CO <sub>2e</sub> kg <sup>-1</sup> | Ecoinvent v. 3.7 |
| Mixed plastics (waste treatment) {GLO}   recycling of mixed plastics   APOS, S                                                              | -1.73   | kg CO <sub>2e</sub> kg <sup>-1</sup> | Ecoinvent v. 3.7 |
| Aluminum (waste treatment) {GLO}   recycling of aluminium   Cut-off, S                                                                      | 0       | kg CO <sub>2e</sub> kg <sup>-1</sup> | Ecoinvent v. 3.7 |
| Aluminum (waste treatment) {GLO}   recycling of aluminium   APOS, S                                                                         | -21.8   | kg CO <sub>2e</sub> kg <sup>-1</sup> | Ecoinvent v. 3.7 |
| Packaging glass, white {GLO}   recycling of packaging glass   Cut-off, S                                                                    | 0       | kg CO <sub>2e</sub> kg <sup>-1</sup> | Ecoinvent v. 3.7 |
| Packaging glass, white {GLO}   recycling of packaging glass   APOS, S                                                                       | -1.26   | kg CO <sub>2e</sub> kg <sup>-1</sup> | Ecoinvent v. 3.7 |
| Steel and iron (waste treatment) {GLO}   recycling of steel and iron   Cut-off, S                                                           | 0       | kg CO <sub>2e</sub> kg <sup>-1</sup> | Ecoinvent v. 3.7 |
| Steel and iron (waste treatment) {GLO}   recycling of steel and iron   APOS, S                                                              | -1.73   | kg CO <sub>2e</sub> kg <sup>-1</sup> | Ecoinvent v. 3.7 |
| Waste wood, untreated {IT}   market for waste wood, untreated   Cut-off, S                                                                  | 0.0585  | kg CO <sub>2e</sub> kg <sup>-1</sup> | Ecoinvent v. 3.7 |
| Waste wood, untreated {IT}   market for waste wood, untreated   APOS, S                                                                     | 0.0776  | kg CO <sub>2e</sub> kg <sup>-1</sup> | Ecoinvent v. 3.7 |
| Biowaste {RoW}   treatment of biowaste, industrial composting   Cut-off, S                                                                  | 0.0588  | kg CO <sub>2e</sub> kg <sup>-1</sup> | Ecoinvent v. 3.7 |
| Biowaste {RoW}   treatment of biowaste, industrial composting   APOS, S                                                                     | 0.0589  | kg CO <sub>2e</sub> kg <sup>-1</sup> | Ecoinvent v. 3.7 |
| Biowaste {RoW}   treatment of biowaste by anaerobic digestion   Cut-off, S                                                                  | 0.118   | kg CO <sub>2e</sub> kg <sup>-1</sup> | Ecoinvent v. 3.7 |
| Biowaste {RoW}   treatment of biowaste by anaerobic digestion   APOS, S                                                                     | 0.148   | kg CO <sub>2e</sub> kg <sup>-1</sup> | Ecoinvent v. 3.7 |
| <b>Incineration</b>                                                                                                                         |         |                                      |                  |

|                                                                                 |        |                                      |                  |
|---------------------------------------------------------------------------------|--------|--------------------------------------|------------------|
| Waste paperboard {RoW}  treatment of, municipal incineration   Cut-off, S       | 0.0316 | kg CO <sub>2e</sub> kg <sup>-1</sup> | Ecoinvent v. 3.7 |
| Waste plastic, mixture {RoW}  treatment of, municipal incineration   Cut-off, S | 2.38   | kg CO <sub>2e</sub> kg <sup>-1</sup> | Ecoinvent v. 3.7 |
| Waste wood, untreated {RoW}  treatment of, municipal incineration   Cut-off, S  | 0.0145 | kg CO <sub>2e</sub> kg <sup>-1</sup> | Ecoinvent v. 3.7 |
| Scrap aluminum {RoW}  treatment of, municipal incineration   Cut-off, S         | 0.0135 | kg CO <sub>2e</sub> kg <sup>-1</sup> | Ecoinvent v. 3.7 |
| Raw sewage sludge {RoW}  treatment of, municipal incineration   Cut-off, S      | 0.0772 | kg CO <sub>2e</sub> kg <sup>-1</sup> | Ecoinvent v. 3.7 |
| Scrap steel {EU without CH}  treatment of, municipal incineration   Cut-off, S  | 0.0102 | kg CO <sub>2e</sub> kg <sup>-1</sup> | Ecoinvent v. 3.7 |
| Waste glass {RoW}  treatment of, municipal incineration   Cut-off, S            | 0.0175 | kg CO <sub>2e</sub> kg <sup>-1</sup> | Ecoinvent v. 3.7 |
| Municipal solid waste {IT}  treatment of, incineration   Cut-off, S             | 0.519  | kg CO <sub>2e</sub> kg <sup>-1</sup> | Ecoinvent v. 3.7 |
| Municipal solid waste {IT}  treatment of, incineration   APOS, S                | 0.520  | kg CO <sub>2e</sub> kg <sup>-1</sup> | Ecoinvent v. 3.7 |

**Table S2.** Details of the LCA model used to estimate the carbon footprint of the 168-g cardboard pizza box using the software SimaPro and embedded databases.

| Documentation                                                                                                              | Input/output         | Parameters | System description                             |
|----------------------------------------------------------------------------------------------------------------------------|----------------------|------------|------------------------------------------------|
| Products                                                                                                                   |                      |            |                                                |
| Outputs to technosphere: Products and co-products                                                                          |                      |            |                                                |
| Pizza- Cardboard box                                                                                                       | Amount               | Unit       | Quantity Allocatic Waste type Category Comment |
|                                                                                                                            | 168                  | g          | Mass 100 % Cardboard ..Transformation          |
| Add                                                                                                                        |                      |            |                                                |
| Outputs to technosphere: Avoided products                                                                                  |                      |            |                                                |
| Add                                                                                                                        |                      |            |                                                |
| Inputs                                                                                                                     |                      |            |                                                |
| Inputs from nature                                                                                                         |                      |            |                                                |
| Add                                                                                                                        |                      |            |                                                |
| Inputs from technosphere: materials/fuels                                                                                  |                      |            |                                                |
| Aluminium, primary, ingot (IAI Area, EU27 & EFTA)   production   Cut-off, S                                                | Amount               | Unit       | Distrib SD2 or 2SC Min Max Comment             |
|                                                                                                                            | 11.11                | g          | Undefi                                         |
| Corrugated board box (RER)   production   Cut-off, S                                                                       | Amount               | Unit       | Distrib SD2 or 2SC Min Max Comment             |
|                                                                                                                            | 168-11.11-5.12 = 152 | g          | Undefi                                         |
| Polyethylene terephthalate, granulate, amorphous, recycled (RoW)   polyethylene terephthalate production   Cut-off, S      | Amount               | Unit       | Distrib SD2 or 2SC Min Max Comment             |
|                                                                                                                            | 5.12                 | g          | Undefi                                         |
| Add                                                                                                                        |                      |            |                                                |
| Inputs from technosphere: electricity/heat                                                                                 |                      |            |                                                |
| Sheet rolling, aluminium (RER)   processing   Cut-off, S                                                                   | Amount               | Unit       | Dis SD2 or Min Max Comment                     |
|                                                                                                                            | 11.11                | g          | Un                                             |
| Laminating service, foil, with acrylic binder (RER)   processing   Cut-off, S                                              | Amount               | Unit       | Dis SD2 or Min Max Comment                     |
|                                                                                                                            | 2925                 | cm2        | Un                                             |
| Transport, freight, lorry 7.5-16 metric ton, EUROS (RER)   transport, freight, lorry 7.5-16 metric ton, EUROS   Cut-off, S | Amount               | Unit       | Dis SD2 or Min Max Comment                     |
|                                                                                                                            | 0/1000*300 = 0       | kgkm       | PS - FG                                        |
| Extrusion, plastic film (RER)   extrusion, plastic film   Cut-off, S                                                       | Amount               | Unit       | Dis SD2 or Min Max Comment                     |
|                                                                                                                            | 5.12                 | g          | Un                                             |

**Table S3.** Details of the LCA model used to estimate the carbon footprint of the 5-L metal can containing extra-virgin olive oil using the software SimaPro and embedded databases.

| Documentation                                                                                                              | Input/output   | Parameters | System description                             |
|----------------------------------------------------------------------------------------------------------------------------|----------------|------------|------------------------------------------------|
| Products                                                                                                                   |                |            |                                                |
| Outputs to technosphere: Products and co-products                                                                          |                |            |                                                |
| Pizza- EVOO 5-kg can                                                                                                       | Amount         | Unit       | Quantity Allocatic Waste type Category Comment |
|                                                                                                                            | 1              | kg         | Mass 100 % Steel ..Transformation              |
| Add                                                                                                                        |                |            |                                                |
| Outputs to technosphere: Avoided products                                                                                  |                |            |                                                |
| Add                                                                                                                        |                |            |                                                |
| Inputs                                                                                                                     |                |            |                                                |
| Inputs from nature                                                                                                         |                |            |                                                |
| Add                                                                                                                        |                |            |                                                |
| Inputs from technosphere: materials/fuels                                                                                  |                |            |                                                |
| Steel, low-alloyed (RoW)   steel production, converter, low-alloyed   Cut-off, S                                           | Amount         | Unit       | Distrib SD2 or 2SC Min Max Comment             |
|                                                                                                                            | 1              | kg         | Undefi                                         |
| Add                                                                                                                        |                |            |                                                |
| Inputs from technosphere: electricity/heat                                                                                 |                |            |                                                |
| Transport, freight, lorry 7.5-16 metric ton, EUROS (RER)   transport, freight, lorry 7.5-16 metric ton, EUROS   Cut-off, S | Amount         | Unit       | Dis SD2 or Min Max Comment                     |
|                                                                                                                            | 0/1000*300 = 0 | kgkm       | PS - FG                                        |
| Metal working, average for steel product manufacturing (RoW)   processing   Cut-off, S                                     | Amount         | Unit       | Dis SD2 or Min Max Comment                     |
|                                                                                                                            | 1              | kg         | Un                                             |
| Add                                                                                                                        |                |            |                                                |

**Table S4.** Mass of several Marinara and Margherita pizza types as weighted at the inlet and outlet of the wood-fired oven, or just 2 minutes later when put in a plate or cardboard to be served.

| Pizza Mass                          | Marinara Pizza | Margherita Pizza | Unit |
|-------------------------------------|----------------|------------------|------|
| As entering the wood-fired oven     | 350±4          | 417±6            | g    |
| As exiting from the wood-fired oven | 313±2          | 377±5            | g    |
| As dished to be served              | 311±2          | 375±5            | g    |

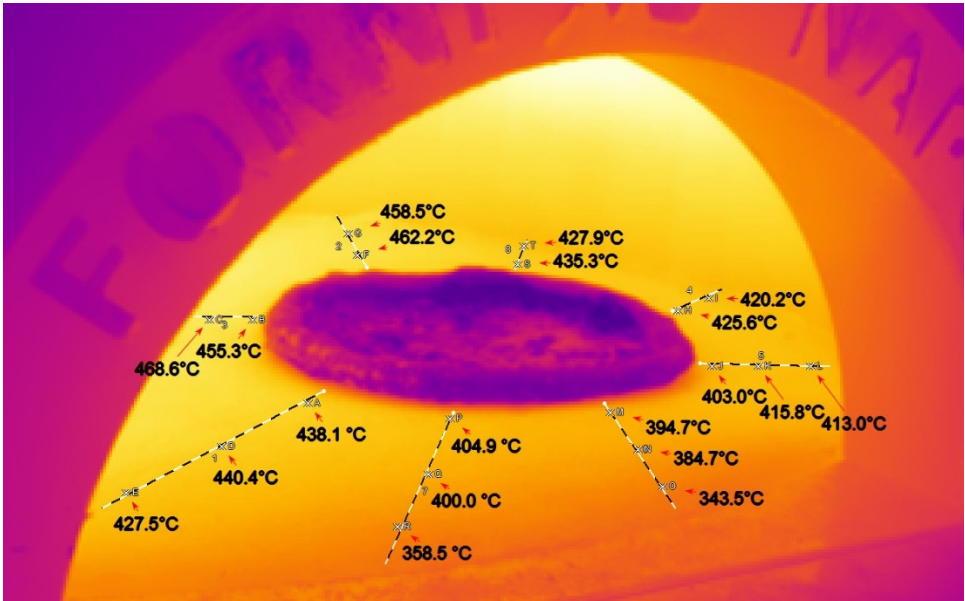

**Figure S1.** Radial profiles of the temperature of the wood-fired oven floor, as measured using a non-contact infrared thermometer.



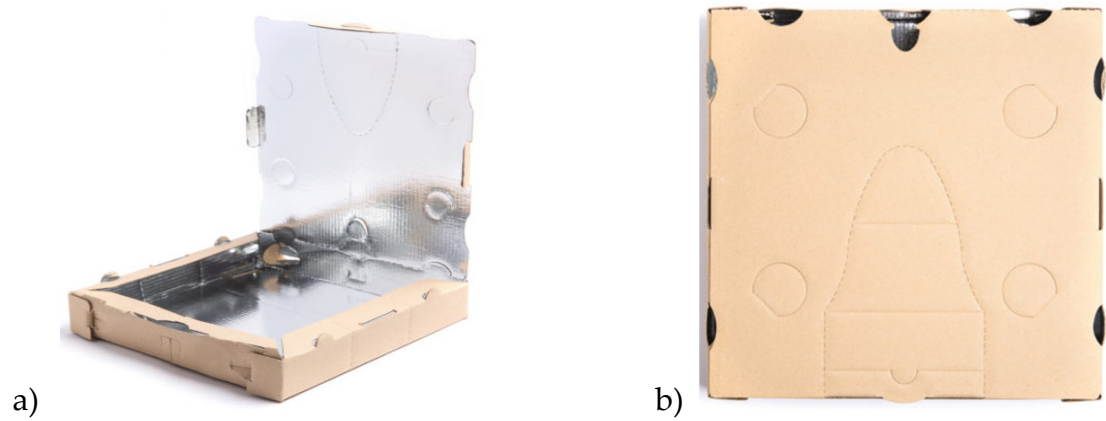

**Figure S2.** Pictures of the empty open (a) and closed (b) pizza corrugated cardboard boxes used in the pizzeria examined in this work.
